# Supplementary material
Source: publisher site journal article supplement (https://www.dovepress.com/article/396663)
Supplement: Supplementary file 1 [file get_supplementary_file.php]

Table S1. Characteristics of included studies

| Author | Year | Country | Study design | Reference standard | Type of COPD | No. of participants(male) | Average   Age | FEV1 (%   pred) | FEV1/FVC   (%) | Smokers   (%) | Pack-years   for ever-  smokers | Tested   sample | Measured   time | Type of test   used(Instruments) | Outcomes |
| --- | --- | --- | --- | --- | --- | --- | --- | --- | --- | --- | --- | --- | --- | --- | --- |
| Wang17 | 2011 | China | CS | ATS | SCOPD | 44(86.4%) | 58 | 82.52±26.73 | 62.84±16.76 | NA | NA | venous blood | NA | ELISA(Biomedical Medizinprodukte) | 1.2 |
| Boschetto14 | 2013 | Italy | CS | The GOLD guidelines | SCOPD | 143(79.0%) | 71 | 81.17±19.89 | NA | NA | NA | plasma | NA | NA | 1.2.6.8 |
| Özdemirel12 | 2014 | Turkey | CC | The GOLD guidelines | SCOPD | 51(78.4%) | 60 | 57.76±11.10 | 59.35±17.77 | 35.3 | 39.83±19.89 | Serum | NA | ECLIA (Elecsys) | 1.2 |
| Liu20 | 2014 | China | CS | The GOLD guidelines | SCOPD and AECOPD | 77(83.1%) | 67 | 55.90±33.53 | 54.53±20.30 | NA | NA | plasma | D1 | ECLIA (Elecsys) | 1.2.3 |
| Huang21 | 2015 | China | CC | The GOLD guidelines | SCOPD | 148(75.0%) | 81 | NA | NA | 43.2 | NA | Serum | D1 | ECLIA (Elecsys) | 1.2.4 |
| Urban16 | 2017 | Austria | CS | The GOLD guidelines | SCOPD | 100(46.0%) | 63 | 64.60±33.38 | 59.00±23.55 | NA | 46.80±39.66 | Venous blood | NA | NA | 1.2 |
| McCall22 | 2018 | UK | CS | The GOLD guidelines | COPD | 76(50.0%) | 66 | NA | NA | 25.0 | 37.03±28.21 | plasma | NA | Meso scale Discovery | 1 |
| Cuthbert23 | 2019 | UK | CS | The GOLD guidelines | COPD | 3068(62.0%) | 71 | NA | 69.00±16.00 | 70.0 | NA | Venous blood | NA | NA | 1.6 |
| Gulen15 | 2019 | Turkey | CC | The GOLD guidelines | SCOPD | 58(91.4%) | 61 | 69.37±26.53 | 63.00±15.12 | NA | 26.50±26.21 | serum | NA | ELISA | 1.2 |
| Patel24 | 2013 | UK | PC | Clinical diagnosis | SCOPD and AECOPD | 55(58.0%) | 72 | 46.70±18.50 | 46.00±14.00 | 20.0 | 46.47±40.34 | serum | NA | ECLIA（Modular  Analytics E 170 Module） | 3 |
| Jiang25 | 2019 | China | CS | The GOLD guidelines | SCOPD and AECOPD | 120(54.2%) | 67 | NA | 44.80±8.76 | 21.0 | NA | plasma | D1 | Quantitative Immunoassay Analyzer | 3 |
| Watz26 | 2007 | Germany | CS | The GOLD guidelines | SCOPD | 170(75.0%) | 64 | 56.34±22.22 | 47.97±13.19 | 42.0 | 51.90±24.80 | NA | NA | NA | 4 |
| Hwang27 | 2007 | Korea | RC | The GOLD guidelines | COPD | 31(71.0%) | 70 | 50.7±21.10 | NA | 35.5 | 29.30±24.80 | NA | NA | NA | 4.7 |
| Rubinsztajn28 | 2013 | Poland | CC | PTChP | SCOPD | 81(56.8%) | 65 | 52.3±17.10 | 49.07±11.40 | NA | 41.00±20.10 | serum | NA | NA(VITROS) | 4 |
| Ghobadi29 | 2018 | Iran | CC | ATS | SCOPD | 82(67.1%) | NA | 48.2±19.33 | 53.53±11.81 | NA | 33.11±15.65 | plasma | NA | ECLIA (Elecsys) | 4 |
| Labaki30 | 2018 | USA | PC | ATS | SCOPD | 1051(58.6%) | 66 | 62.19±23.18 | NA | 32.3 | 53.34±24.31 | NA | NA | Myriad-RBM assay | 4 |
| Andrijevic31 | 2017 | Serbia | PC | The GOLD guidelines | AECOPD | 194(61.3%) | 69 | NA | NA | NA | NA | serum | NA | NA | 5 |
| Spannella32 | 2019 | Italy | PC | Clinical diagnosis | AECOPD | 121(54.5%) | 87 | 46.20±6.40 | NA | NA | NA | NA | NA | NA | 5 |
| Li33 | 2020 | China | PC | The GOLD guidelines | AECOPD | 429(66.4%) | 76 | NA | NA | 19.8 | 46.44±31.05 | venous blood | D1 | ECLIA (Elecsys) | 5 |
| Rutten34 | 2005 | Netherlands | CS | Clinical diagnosis | SCOPD | 405(55.1%) | 73 | 83.29±25.54 | 64.35±14.14 | NA | 18.79±28.87 | serum | D1 | Non-competitive immunoradiometric assay | 6 |
| Khaletskaya35 | 2018 | Russia | PC | Clinical diagnosis | COPD | 80(NA) | NA | NA | NA | NA | NA | serum | NA | EIA | 6.8 |
| Karoli36 | 2019 | Russia | CC | The GOLD guidelines | AECOPD | 281(NA) | 62 | NA | NA | NA | NA | NA | NA | NA | 6.8 |
| Iosip37 | 2018 | Romania | RC | The GOLD guidelines | COPD | 101(48.5%) | 70 | NA | NA | NA | NA | venous blood | D1 | NA (Roche Cardiac Reader point of cave instrument) | 8 |
| Kovacs38 | 2022 | Spain | RC | The GOLD guidelines | COPD | 142(56.0%) | 68 | 55.63±20.22 | 59.67±10.04 | 17.0 | 14.41±22.47 | plasma | NA | NA | 7 |
| Zuo39 | 2019 | China | RC | pulmonary function tests | AECOPD | 185(76.2%) | 71 | NA | NA | NA | NA | NA | D1 | NA | 7 |
| Tian40 | 2021 | China | CC | The GOLD guidelines | AECOPD | 894(59.4%) | 74 | NA | NA | 11.2 | NA | serum | NA | NA(VITROS) | 7 |
| Marcun41 | 2016 | Slovenia | PC | European Respiratory Society guidelines | AECOPD | 116(68.0%) | 70 | 35±15 | NA | 22.0 | NA | serum | NA | ECLIA (Elecsys) | 6 |
| Koliev42 | 2019 | Russia | CC | The GOLD guidelines | SCOPD | 54(NA) | 64 | NA | NA | NA | NA | NA | NA | NA | 6 |
| Vyshnyvetskyy43 | 2017 | Ukraine | PC | The GOLD guidelines | SCOPD | 177(NA) | NA | 71.36±17.46 | NA | NA | NA | venous blood | NA | ECLIA(Cobas) | 6 |

**Abbreviations:** CS, cross-sectional study; COPD, chronic obstructive pulmonary disease; SCOPD, stable chronic obstructive pulmonary disease; AECOPD, acute exacerbation of chronic obstructive pulmonary disease; CC, case control study; FEV1, forced expiratory volume in 1 s; FVC, forced vital capacity; GOLD, the Global Initiative for Chronic Obstructive Pulmonary Disease; PTChP, the Polish Society of Lung Diseases guidelines; ATS, American Thoracic Society guidelines; NA, not available; PC, prospective cohort study; RC, retrospective cohort study；ELISA, enzyme-linked immunosorbent assay; ECLIA, electrochemiluminescence immunoassay; EIA, enzyme immunoassay.

1. Predictive value for COPD (versus non-COPD);2. Predictive value for stable COPD (versus healthy);3. Predictive value for AECOPD (versus SCOPD);4. Predictive value for severity of COPD;5. Prognosis value for hospitalized AECOPD;6. Predictive value for COPD with CHF;7. Predictive value for COPD with PH;8. Predictive value for CHF with COPD.

Table S2. The levels of NT-proBNP for COPD patients

| Section | Studies, no. | SMD | 95% CI | *p* value | *Heterogeneity* (*I2*), *p* value |
| --- | --- | --- | --- | --- | --- |
| NT-proBNP levels for COPD versus non-COPD | 9 | 0.46 | 0.22,0.70 | 0.0002 | 66%, *p*＜0.01 |
| NT-proBNP levels for SCOPD versus Healthy | 7 | 0.51 | 0.13,0.89 | 0.0092 | 68%, *p*＜0.01 |
| NT-proBNP levels for AECOPD versus SCOPD | 3 | 1.18 | 0.07,2.29 | 0.037 | 95%, *p*＜0.01 |
| NT-proBNP levels for different severities of COPD | 6 | 0.17 | 0.05,0.29 | 0.0058 | 0%, *p*=0.54 |
| NT-proBNP levels for different risks of in-hospital mortality in patients with AECOPD | 3 | 1.67 | 0.47,2.88 | 0.0063 | 95%, *p*＜0.0001 |
| The levels of NT-proBNP for COPD with cardiovascular disease |  |  |  |  |  |
| NT-proBNP levels for COPD with CHF versus COPD | 7 | 1.49 | 0.96,2.01 | ＜0.0001 | 89%, *p*＜0.01 |
| NT-proBNP levels for CHF with COPD versus CHF | 4 | 0.21 | -0.20,0.62 | 0.3171 | 71%, *p*=0.01 |
| NT-proBNP levels for COPD with PH versus COPD | 4 | 0.82 | 0.69,0.96 | ＜0.0001 | 0%, *p*=0.96 |

**Abbreviations:** NT-proBNP, amino-terminal pro-brain natriuretic peptide; COPD, chronic obstructive pulmonary disease; SMD, standardized mean difference; CI, Confidence Interval; SCOPD, stable chronic obstructive pulmonary disease; AECOPD, acute exacerbation of chronic obstructive pulmonary disease; CHF, chronic heart failure; PH, pulmonary hypertension.
